# Supplementary material for: Review and Comparison of Antimicrobial Resistance Gene Databases
Source: Preprints.org preprint supplement (doi:10.20944/preprints202202.0200.v1), 2022-02-17
Supplement: Supplementary file 1 [file supplementary]

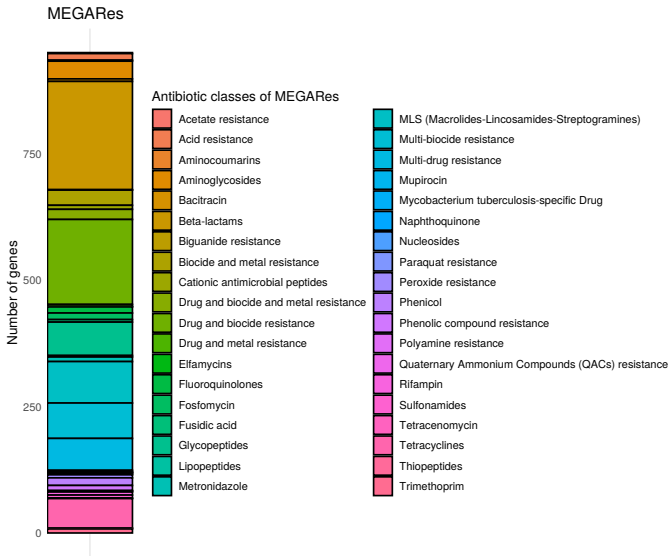

**Supplementary Figure 1: MEGARes gene counts of each antibiotic class.** Number of resistance genes were determined for each class of antibiotics stored in the MEGARes database. Only antibiotic- and biocid resistance genes were considered for this plot.

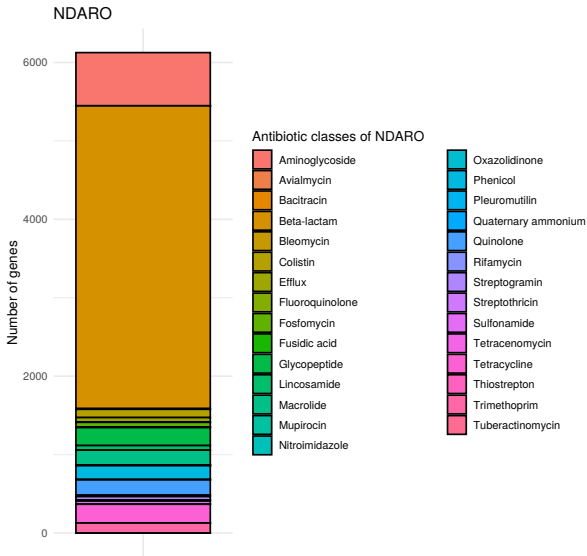

**Supplementary Figure 2: NDARO gene counts of each antibiotic class.** Number of resistance genes were determined for each class of antibiotics stored in the NDARO database. Only antibiotic- and biocid resistance genes were considered for this plot.

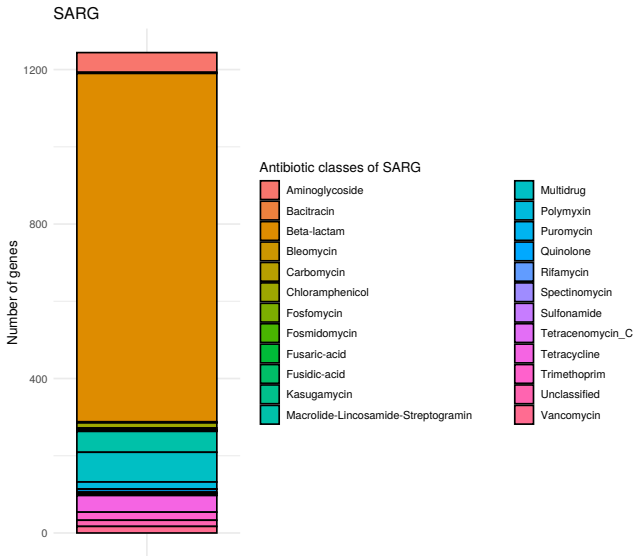

**Supplementary Figure 3: SARG gene counts of each antibiotic class.** Number of resistance genes were determined for each class of antibiotics stored in the SARG database. Only antibiotic- and biocid resistance genes were considered for this plot.
